# Supplementary material for: Hemocyte siRNA uptake is increased by 5′ cholesterol-TEG addition in Biomphalaria glabrata, snail vector of schistosome
Source: PeerJ. 2021 Feb 23;9:e10895. doi: 10.7717/peerj.10895 (PMC7908872; doi:10.7717/peerj.10895)
Supplement: Data S1 — Four tables with the corresponding raw data for Figures 1C, 2, 3 and 4A. [file peerj-09-10895-s002.xlsx]

## Sheet: Fig. 1C
Flow Cytometry: Raw Data - FlowJo Analyses
% of fluorescent hemocytes
in vitro siRNA exposition - 2µg
		30 min	1h	2h	4h	6h	8h
CY3-GFP siRNA	Replicate 1	5.95	5.15	3.2	3.61	2.83	3.73
	Replicate 2	5.65	5.13	4.31	3.36	3.83	3.64
	Replicate 3	2.42	4.45	6.4	2.71	3.77	3.78
	Replicate 4	3.51	4.85	3.67	3.27	3.49	3.29
Chol-GFP-Cy3 siRNA	Replicate 1	45.9	45.9	52.1	43.4	56.7	45.9
	Replicate 2	30.2	42.4	51.7	26	42.6	45.6
	Replicate 3	43.4	35.4	40.1	43.3	48.1	44.5
	Replicate 4	39.3	44.6	38.2	47.5	41.5	46.2
Control (no siRNA)	Replicate 1	1.9
	Replicate 2	1.56
	Replicate 3	1.53
	Replicate 4	1.41
	Replicate 5	0.22
	Replicate 6	0.98
	Replicate 7	0.52
	Replicate 8	0.62

## Sheet: Fig. 2
Flow Cytometry: Raw Data - FlowJo Analyses
% of fluorescent hemocytes
in vivo siRNA exposition - 2µg
		2h	4h	6h	12h	24h
Chol-GFP-Cy3 siRNA	Replicate 1	1.68	2.05	4.2	1.73	2.04
	Replicate 2	2.29	2.85	3.03	2.36	1.94
	Replicate 3	3.15	3.14	2.77	2.48	1.89
	Replicate 4	1.62	1.98	3.36	1.48	1.64

## Sheet: Fig. 3
Flow Cytometry: Raw Data - FlowJo Analyses
% of fluorescent hemocytes
in vivo siRNA exposition - 2, 5 and 10 µg
		2 µg	5 µg	10 µg
Chol-GFP-Cy3 siRNA	Replicate 1	3.15	16.4	54.7
	Replicate 2	3.76	12.7	53.3
	Replicate 3	2.2	3.13	47.7
	Replicate 4	1.87	9.8	55.2

## Sheet: Fig. 4a
RT-QPC R, raw data
Ct values
			day 1 post injection		day2 post injection		day 3 post injection		day 4 post injection
			BgTEP	S19	BgTEP	S19	BgTEP	S19	BgTEP	S19
in vivo BgTEP siRNA injection	Biological replicate A	Technical replicate 1	29.49	19.7	33.08	21.69	32.86	21.66	34.09	22.44
		Technical replicate 2	29.26	19.78	32.82	21.86	32.50	21.42	32.81	22.6
		Technical replicate 3	29.49	19.81	32.53	21.96	32.42	21.60	33.06	22.71
	Biological replicate B	Technical replicate 1	30.09	20.79	33.90	22.44	33.25	21.85	31.74	22.25
		Technical replicate 2	29.90	20.78	33.90	22.52	32.33	22.12	31.59	22.18
		Technical replicate 3	30.07	20.91	33.52	22.71	32.16	22.16	31.93	22.51
	Biological replicate C	Technical replicate 1	29.92	20.60	31.18	20.81	31.87	21.93
		Technical replicate 2	30.18	20.65	31.66	21.05	32.34	21.85
		Technical replicate 3	29.85	20.58	32.12	21.09	32.30	21.85
			day 1 post injection		day2 post injection		day 3 post injection		day 4 post injection
			BgTEP	S19	BgTEP	S19	BgTEP	S19	BgTEP	S19
in vivo GFP siRNA injection	Biological replicate A	Technical replicate 1	33.08	21.17	31.97	20.91	30.93	21.03	33.24	22.12
		Technical replicate 2	31.54	21.13	32.61	20.99	30.65	21.02	32.50	22.20
		Technical replicate 3	32.33	21.23	31.67	21.19	31.10	21.12	32.34	22.33
	Biological replicate B	Technical replicate 1	31.52	20.27	31.06	20.35	29.71	21.52	33.95	26.74
		Technical replicate 2	31.76	20.22	31.14	20.34	29.51	21.57	34.58	26.91
		Technical replicate 3	31.79	20.44	30.91	20.50	29.98	21.66	35.06	27.12
	Biological replicate C	Technical replicate 1	30.46	20.00	30.57	20.58	30.22	21.30
		Technical replicate 2	30.55	20.11	30.45	20.65	30.41	21.32
		Technical replicate 3	30.57	20.04	30.76	20.73	30.88	21.07
			BgTEP	S19
no injection, untreated snails	Biological replicate A	Technical replicate 1	31.71	20.84
		Technical replicate 2	30.99	20.87
		Technical replicate 3	30.80	20.92
	Biological replicate B	Technical replicate 1	30.02	20.65
		Technical replicate 2	29.94	20.68
		Technical replicate 3	30.00	20.76
	Biological replicate C	Technical replicate 1	29.02	20.06
		Technical replicate 2	29.00	20.11
		Technical replicate 3	28.84	20.18
